# Supplementary material for: Size- and surface chemistry-dependent intracellular localization of luminescent silicon quantum dot aggregates
Source: Royal Society of Chemistry journal article supplement (doi:10.1039/c2jm31112g), 2012-01-01
Supplement: c2jm31112g.pdf [file c2jm31112g.pdf]

## Supplementary Information

# Size- and Surface Chemistry-Dependent Intracellular Localization of Luminescent Silicon Quantum Dot Aggregates

Seiichi Ohta\*, Peng Shen, Susumu Inasawa and Yukio Yamaguchi

Department of Chemical System Engineering, Graduate School of Engineering, The University of

Tokyo, 7-3-1 Hongo, Bunkyo-ku, Tokyo, 113-8656, Japan

Fax: (+81)3-5841-7303 E-mail: s-ohta@chemsys.t.u-tokyo.ac.jp

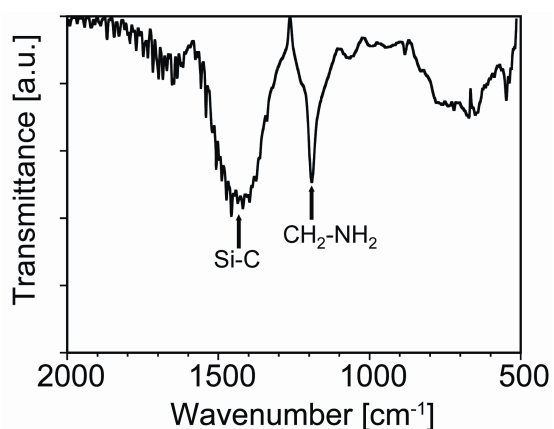

**Figure S1.** ATR-IR spectrum of Si-QDs after allylamine modification. The peak at  $1460\text{ cm}^{-1}$  corresponds to the vibrational scissoring of Si-C and the peaks at  $1100 \sim 1200\text{ cm}^{-1}$  correspond to stretching vibration of  $\text{CH}_2\text{-NH}_2$ . These results confirm the formation of covalent bonds between allylamine molecules and surface of Si-QDs.

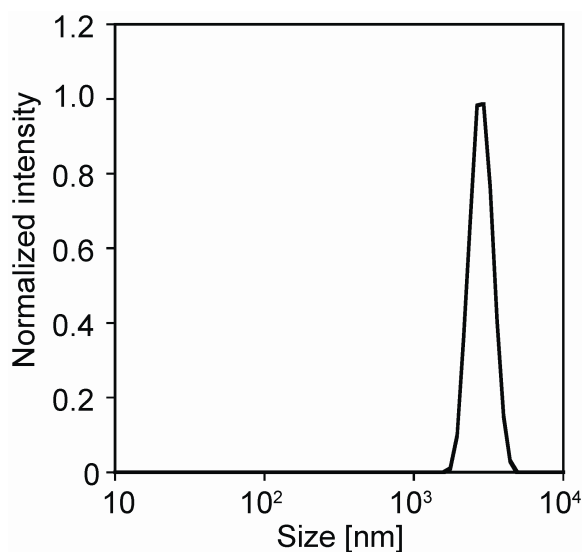

**Figure S2.** Aggregate size distribution of Si-QDs treated with F127 below CMC. Si-QDs were treated with F127. The concentration of F127 was  $5 \times 10^{-3}\text{ wt\%}$ , which is below CMC ( $1.2 \times 10^{-2}\text{ wt\%}$  at  $37\text{ °C}$ ).

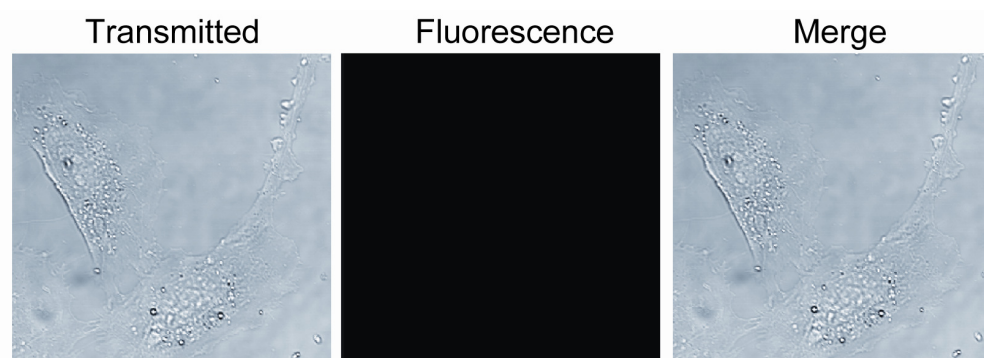

**Figure S3.** Confocal microscopic images of HUVECs exposed to a dispersion of Si-QDs treated with F127 below CMC shown in Fig. S2. HUVECs were incubated in Si-QD medium solution, which is the mixture of 1 ml of Si-QD dispersion (0.4 mg/ml) and 4 ml of the medium solution, for 4 hours in the incubator and washed twice with PBS. Images were observed using a diode laser (405 nm) with a detection range of 430-530 nm.

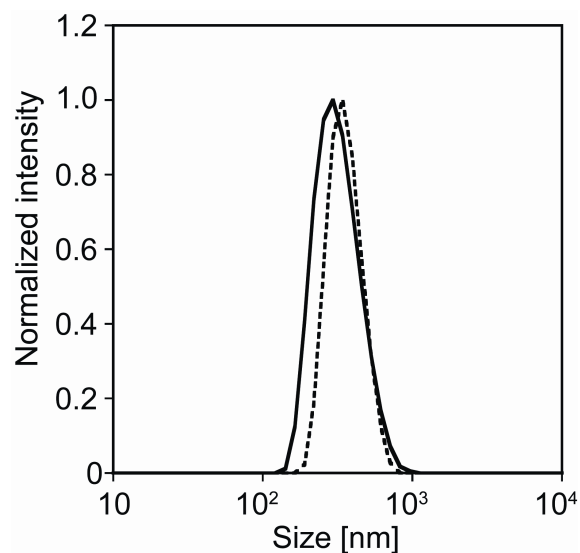

**Figure S4.** Aggregate size distributions of allylamine-modified Si-QDs dispersed in water (solid line) and serum free medium (dashed line).
